# Supplementary material for: Solution-processed assembly of ultrathin transparent conductive cellulose nanopaper embedding AgNWs
Source: Royal Society of Chemistry journal article supplement (doi:10.1039/c5nr03218k), 2015-01-01
Supplement: c5nr03218k1.pdf [file c5nr03218k1.pdf]

## Supporting information

### Solution-processed assembly of ultrathin transparent conductive cellulose nanopaper embedding AgNWs

Yuanyuan Song,<sup>a</sup> Yaoquan Jiang,<sup>b</sup> Liyi Shi,<sup>b</sup> Shaomei Cao,<sup>b</sup> Xin Feng,<sup>a,b,\*</sup> Miao Miao<sup>b</sup> and Jianhui Fang<sup>c</sup>

<sup>a</sup> School of Materials Sciences and Engineering, Shanghai University, Shanghai 200444, P. R. China.

Fax: 86-21-66136038; Tel: 86-21-66137257; E-mail: [fengxin@shu.edu.cn](mailto:fengxin@shu.edu.cn)

<sup>b</sup> Research Center of Nano Science and Technology, Shanghai University, Shanghai 200444, P. R. China.

<sup>c</sup> Department of Chemistry, Shanghai University, Shanghai 200444, P. R. China.

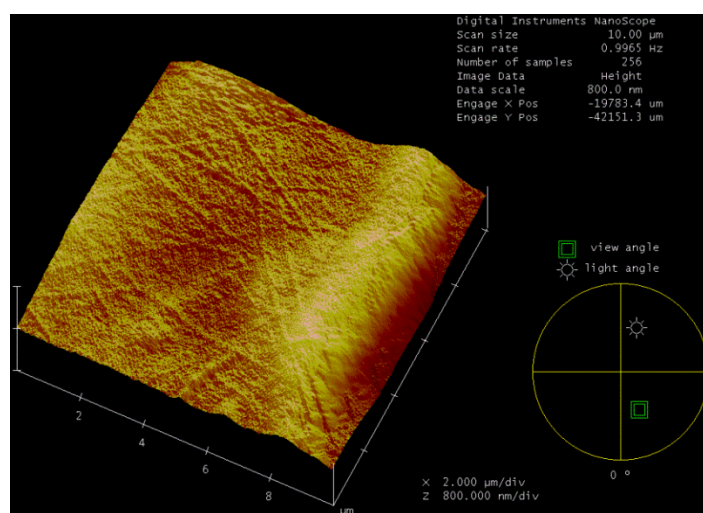

Figure S1 3D AFM image of the BNFC/HNFC/AgNWs hybrid nanopaper with a weight ratio of BNFC/HNFC to AgNWs of 1:1.

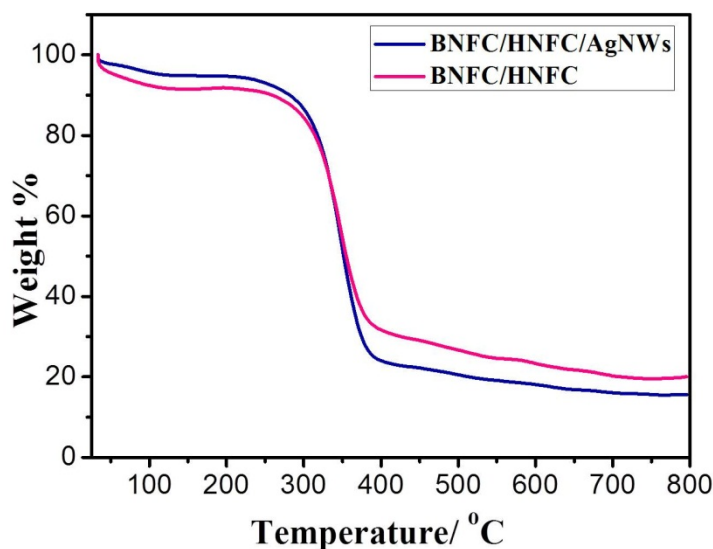

Figure S2 TG curves of BNFC/HNFC/AgNWs hybrid nanopaper and pure BNFC/HNFC nanopaper.

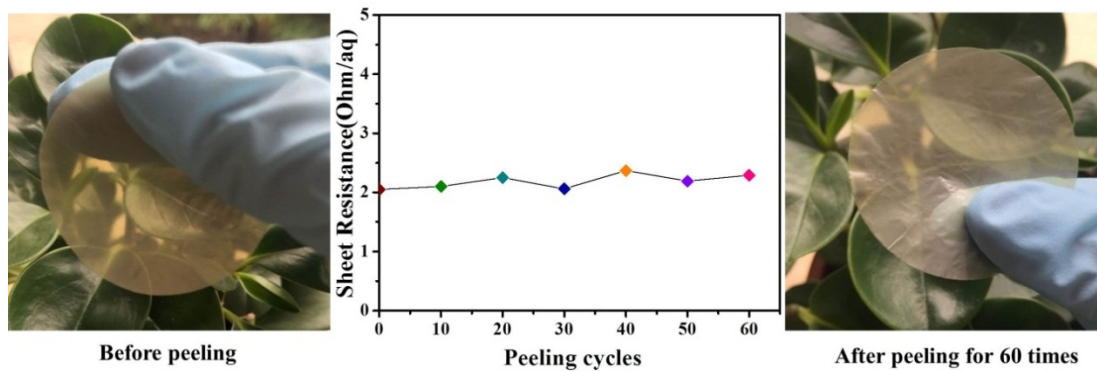

Figure S3 Digital pictures and resistance variation of the BNFC/HNFC/AgNWs hybrid nanopaper before and after peeling test for 60 times.

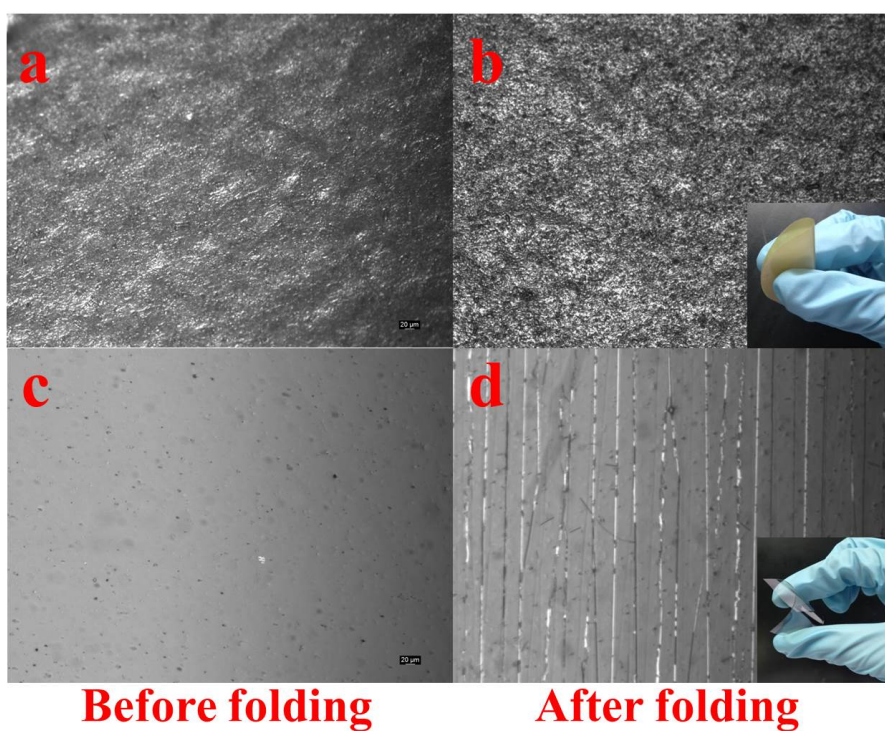

Figure S4 Optical microscope images of the BNFC/HNFC/AgNWs hybrid nanopaper (a,b) and ITO/PET film (c,d).
